# Supplementary figures and images for: Identification of suitable target/E3 ligase pairs for PROTAC development using a rapamycin-induced proximity assay (RiPA)
Source: eLife journal article supplement (doi:10.7554/elife.98450), 2024-07-26

Figure 1 – Source data 1

D

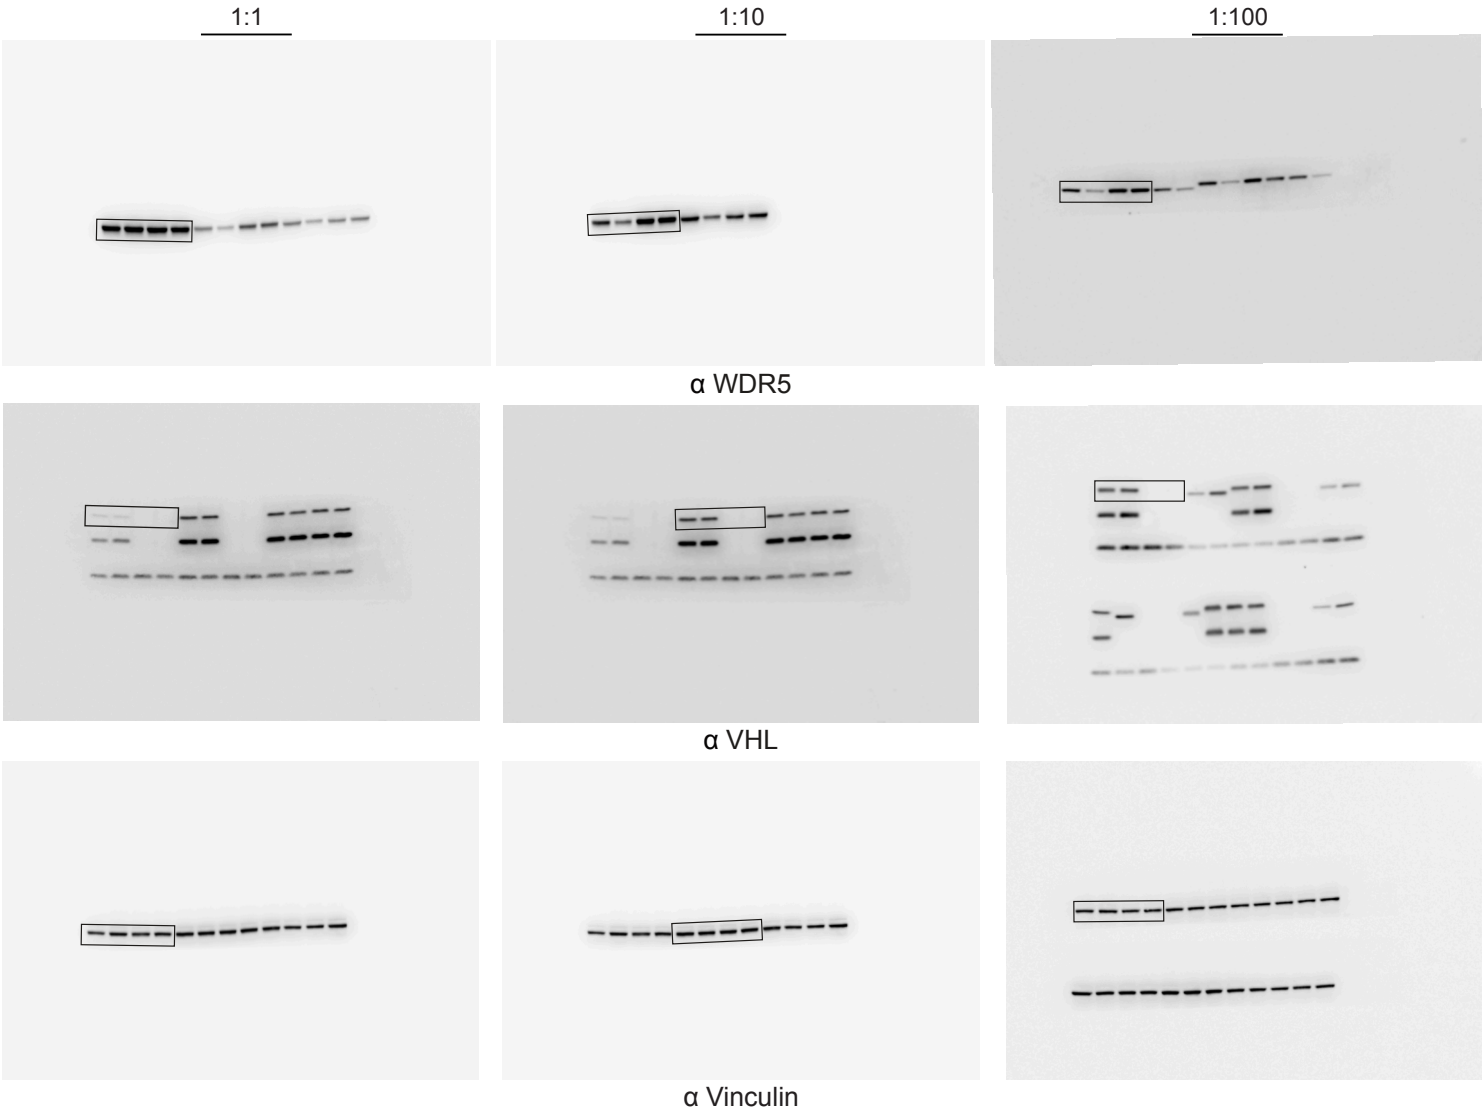

F

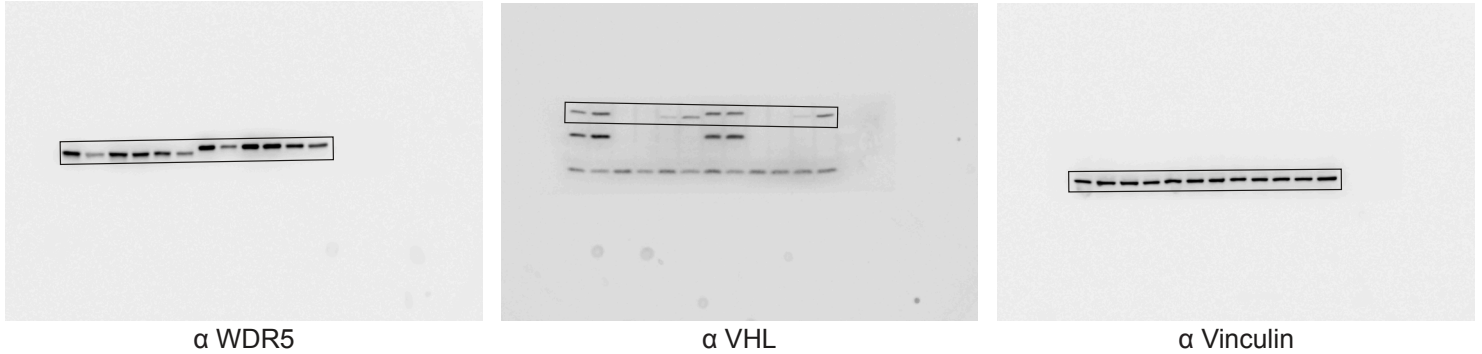

Supplement: fig1-data1 [file elife-98450-fig1-data1-v1.zip]

Figure 2 – Source data 1

A

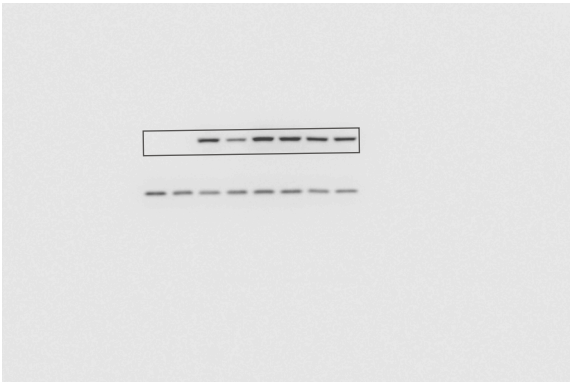

α WDR5

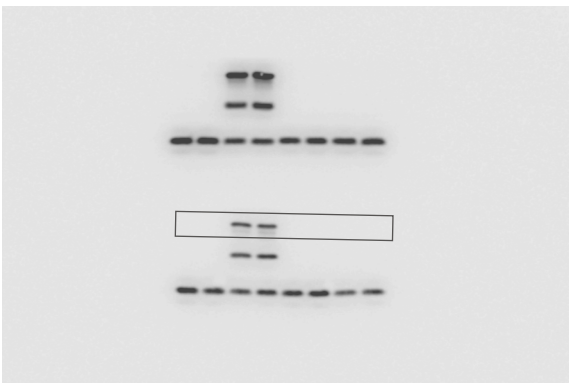

α VHL

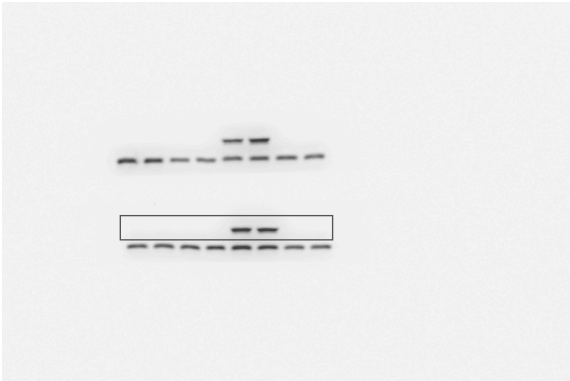

α CRBN

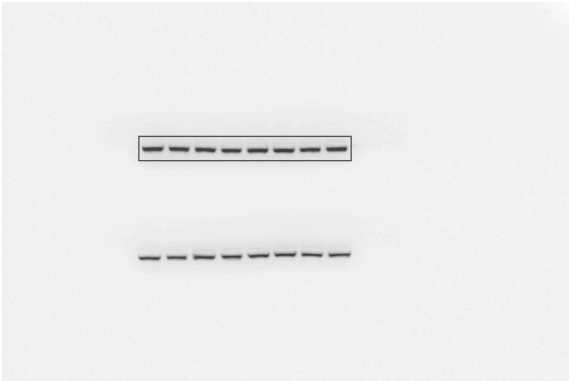

α Vinculin

C

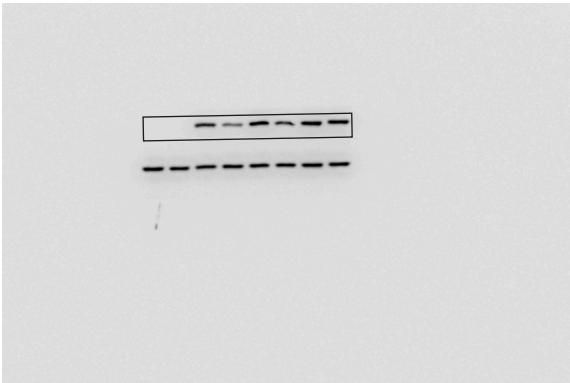

α AURKA

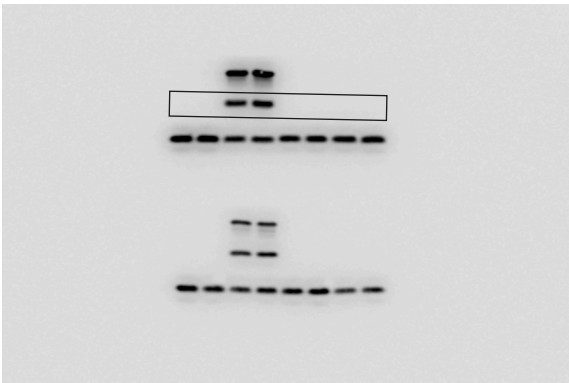

α VHL

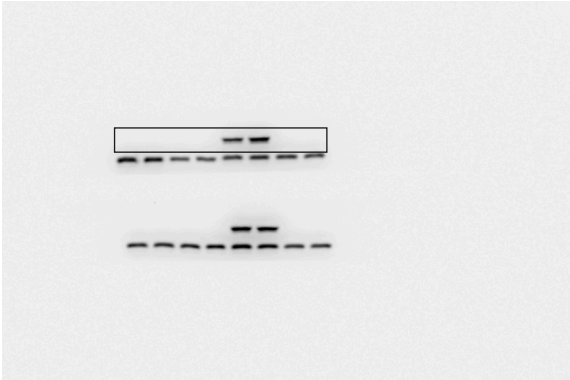

α CRBN

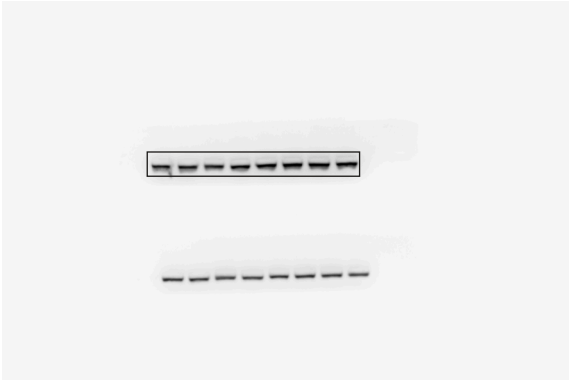

α Vinculin

Supplement: fig2-data1 [file elife-98450-fig2-data1-v1.zip]

Figure 2 - Figure supplement 1 – Source data 1

A

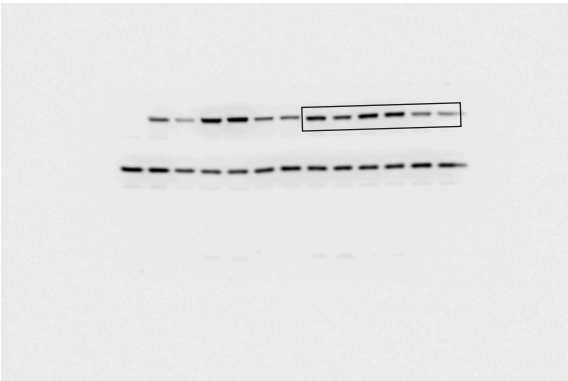

$\alpha$  WDR5

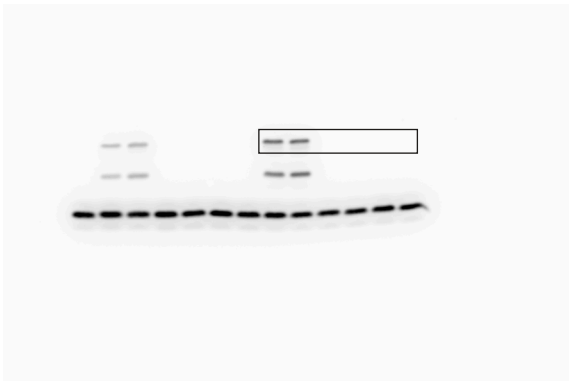

$\alpha$  VHL

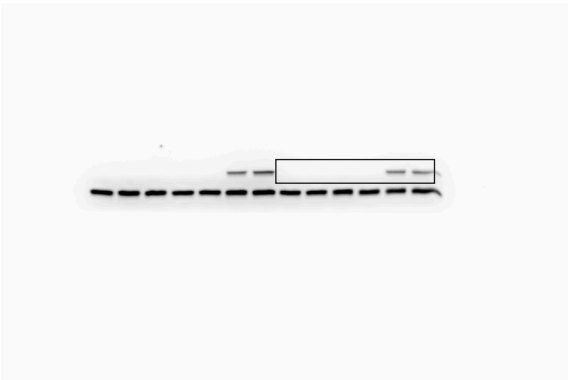

$\alpha$  CRBN

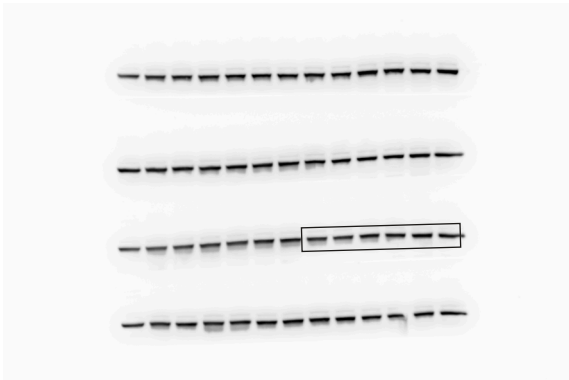

$\alpha$  Vinculin

Supplement: fig2-figsupp1-data1 [file elife-98450-fig2-figsupp1-data1-v1.zip]

Figure 3 – Source data 1

A

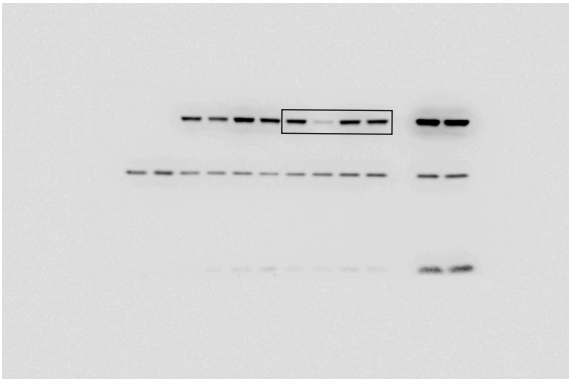

α WDR5

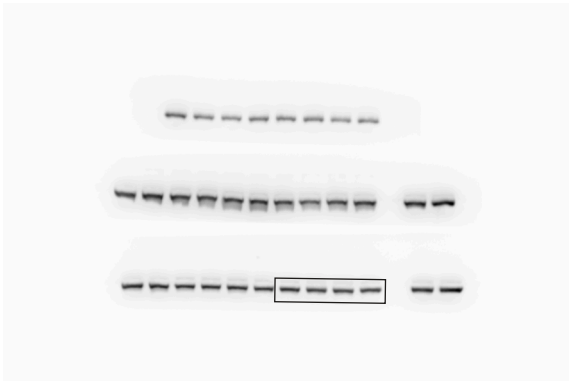

α Vinculin

E

FBXL12-FRB

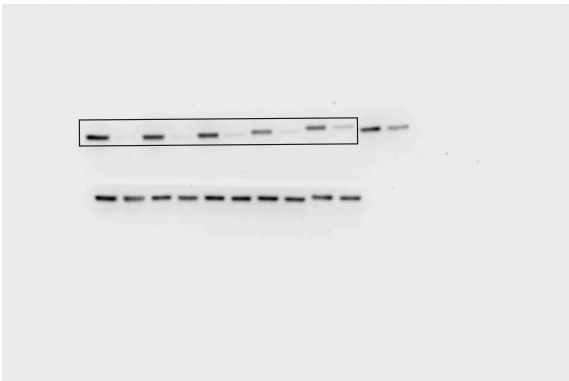

α WDR5

FRB

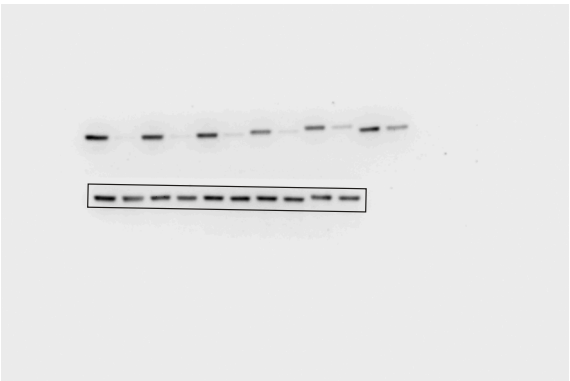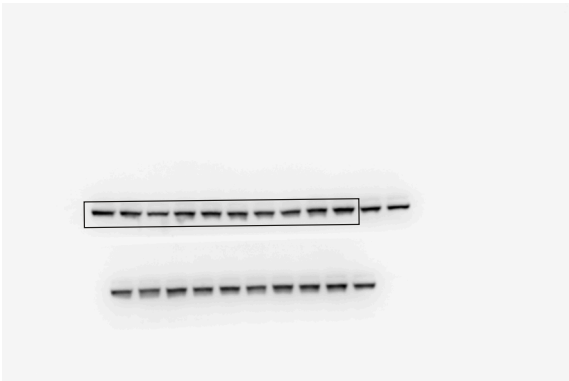

α Vinculin

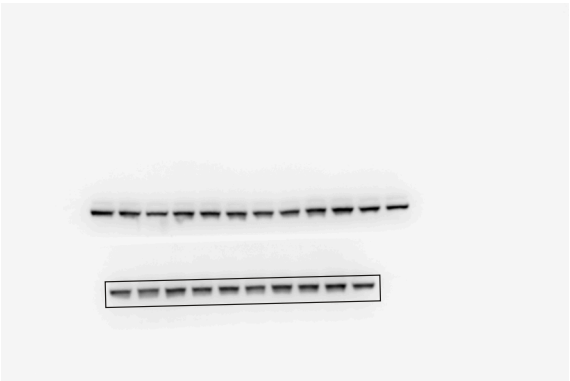

Supplement: fig3-data1 [file elife-98450-fig3-data1-v1.zip]
